# Supplementary material for: Environmentally Friendly Antifouling Metabolites from Red Sea Organisms
Source: Hindawi journal article supplement (doi:10.1155/2019/3278394), 2019-10-30
Supplement: f1 [file 3278394.f1.doc]

Environmentally Friendly Antifouling Metabolites from Red Sea Organisms

Sultan Semran Al-Lihaibi 1, *, Ahmed Abdel-Lateff 2, 3, Walied Mohamed Alarif 1, Hajer Saeed Alorfi4, Yasuyuki Nogata 5 and Tatsufumi Okino 6

1 Department of Marine Chemistry, Faculty of Marine Sciences, King Abdulaziz University, PO. Box 80207, Jeddah 21589, Saudi Arabia; [sallihaibi@kau.edu.sa](mailto:sallihaibi@kau.edu.sa) and walied1737@yahoo.com

2 Department of Natural Products and Alternative Medicine, Faculty of Pharmacy, King Abdulaziz University, PO Box 80260, Jeddah 21589, Saudi Arabia; aabdellatteff@kau.edu.sa

3  Department of Pharmacognosy, Faculty of Pharmacy, Minia University, PO. Box 61511, Minia 61519, Egypt; [ahmedabdellateff@gmail.com](mailto:ahmedabdellateff@gmail.com)

4 Department of Chemistry, Faculty of Science, King Abdulaziz University, PO. Box 80207, Jeddah 21589, Saudi Arabia; [halorfi@kau.edu.sa](mailto:halorfi@kau.edu.sa)

5 Environmental Science Research Laboratory, Central Research Institute of Electric Power Industry, Abiko 270-1194, Japan; noga@criepi.denken.or.jp

6 Graduate School of Environmental Science and Faculty of Environmental Earth Science, Hokkaido, University, Sapporo 060-0810, Japan; okino@ees.hokudai.ac.jp

***** Correspondence: E-Mail. [sallihaibi@kau.edu.sa](mailto:sallihaibi@kau.edu.sa) (S.S.A); Tel.: +966-50-4690-309; Fax: +966-12-6400-736

**Taxonomical identification of Cyanobacteria samples**

The Red Sea cyanobacterial samples were collected from different places by using scuba at a depth of 5−10 m near Jeddah, Saudi Arabia. Foreign particles were removed by hand, and seawater was squeezed out from the samples before storing in MeOH for transportation. A small portion of this material was also preserved in 10 mL of RNAlater (Ambion) solution for genetic analysis. The 16S rRNA gene sequence (GenBank KT380828) of this material is currently available online.

**Table 1S.** Taxonomical identification of the marine samples

| **No.** | **Name** | **Taxa** | **Family** | **Place** | **Time** | **Description** |
| --- | --- | --- | --- | --- | --- | --- |
| SH-1 | *Hypnea cornuta*  (Kützing) J.Agardh, 1851 | [Plantae](http://www.marinespecies.org/aphia.php?p=taxdetails&id=3), [Rhodophycota](http://www.marinespecies.org/aphia.php?p=taxdetails&id=182729) | [Cystocloniaceae](http://www.algaebase.org/browse/taxonomy/?id=5219) | Al-Mejerma | Mar.  2013 | Plants pinkish red in colour, up to 30 cm in length, initially attached to substratum, later often free floating, freely branched; branches covered with short spine like branches The Hypnea cornuta bears resemblance to the Hypnea musciformis, which is more common. The species differ in general shape, thinner branches and a lack of hook-like features; but the most distinctive feature is the star-shaped hair. These can be seen even with the naked eye, and gently shaking the alga dislocates them.  Its branches are thinner than those of the Hypnea musciformis, and two or three-horned starry hairs grow from each hook-like branch. |
| SH-2 | *L. papillosa*  (C.Agardh) Greville, 1830 | [Plantae](http://www.marinespecies.org/aphia.php?p=taxdetails&id=3), [Rhodophycota](http://www.marinespecies.org/aphia.php?p=taxdetails&id=182729) | [Rhodomelaceae](http://en.wikipedia.org/wiki/Rhodomelaceae) | Al-Mejerma | Mar.  2013 | Plants dark red to brownish red in colour, 8 – 10 cm tall, erect, attached by discoid holdfasts; many erect axes arise from holdfast; erect axes irregularly branched, cartilaginous, branches covered densely with short wart like tuberculate branchlets; superfi cial cells elongated, palisade-like. |
| SH-3 | *Siphonochalina*  *siphonella*  Lévi, 1965 | Porifera | Callyspongiidae | Sharm Obhur | Feb.  2013 | It is an intertidal or shallow-subtidal, thickly encrusting, massive or occasionally branching sponge, with typical volcanoe-shaped oscular chimneys. Colour green or yellow. It emits a characteristic disagreeable smell, said to be similar to that of "carbide". Surface smooth. Consistency firm, texture crumb-of-bread (hence its popular name "crumb-of-bread sponge". Ectosome detachable. Spicules oxeas only. |
| SH-4 | *Sinularia polydactyla*  (Eherenberg, 1834) | [*Alcyoniina*](http://en.wikipedia.org/w/index.php?title=Alcyoniina&action=edit&redlink=1) | Alcyoniidae | Al-getaa Al-sghira | Feb.  2013 | The colonies of this species resemble a set of fingers held upright. Though these species are very easily identifiable, discerning the various species amongst this genus is no easy task. This minute identification process will often involve a close look at sclerites, which are minuscule calcareous particles that live embedded on corals' tissue. This species may be found in the lower areas of a reef, especially where turbidity is higher. |
| SH-5 | *Heteroxenia fuscescens*  (Ehrenberg, 1834) | [*Alcyoniina*](http://en.wikipedia.org/w/index.php?title=Alcyoniina&action=edit&redlink=1) | [Xeniidae](http://en.wikipedia.org/wiki/Xeniidae) | Sharm Obhur | Feb.  2013 | Adult colonies can raech up to 120-150 mm in total hight with strong unbranched syndete up to 70 mm in length and 50 mm in diameter. It expands into a convex capitulum bearing a dense carpet of siphonzooids in mature colonies, out of which long polyp of about 50-70 mm arise. The pulsating tentacles can reach 10-15 mm i length and are of soft, feathery appearance. The range and number of pinnules, however, has to be extended to be about 24-33%. The color in life is pale yellowish-brown. |
| SH-6 | *Petrosia* sp. | Porifera | Petrosiidae | Al-shoiba | Feb.  2013 | Color in life: surface reddish-brown, inside creamy. Rather soft consistency, not elastic, easy to cut, brittle, surface smooth. Growth form: plate-like crusts, mostly about 2–4 cm thick or fan-shaped of about 2 cm thickness. Often resembling an “elephant ear”. Sometimes certain parts of the sponge are fixed crusts and parts of the same specimen are free plates lying on the substrate without fixation. |
| SH-7 | *Hyrtios erectus*  (Keller, 1889) | Porifera | [Thorectidae](http://www.marinespecies.org/porifera/porifera.php?p=taxdetails&id=131627) | Sharm Obhur | Feb.  2013 | It forms pinkish-gray tubes. Surface of the sponge is densely conulose. The skeleton is dense, anisotropic, and consisting of sand-filled primary and secondary fibers, near the surface forming fascicles. The surface aspect and skeletal characters conform to the genus Hyrtios. |
| SH-8 | *Halimeda tuna*  (J.Ellis & Solander) J.V.Lamouroux, 1816 | [Plantae](http://www.marinespecies.org/aphia.php?p=taxdetails&id=3), [Chlorophyta](http://www.marinespecies.org/aphia.php?p=taxdetails&id=801) | [Halimedaceae](http://www.marinespecies.org/aphia.php?p=taxdetails&id=368715) | Sharm Obhur | Mar.  2013 | Plants dark green in colour, 8 – 10 cm tall, generally tufted, moderately calcified and attached by compressed conical holdfast, branching in one plane, dichotomous or trichotomous upper segments, cuneate remiform discoid, 6–13 mm high, 5–23 mm broad, margins entire; subcortical utricles turbinate to clavate 30–110 μm diameter and cortical utricles 25–125 μm diameter; medullary filaments entangled, fusing 2–3 together at the nodes, dichotomously branched above the fused fi laments. |
| SH-9 | *Halimeda macroloba*  [Decaisne, 1841](http://www.marinespecies.org/aphia.php?p=taxdetails&id=211524) | [Plantae](http://www.marinespecies.org/aphia.php?p=taxdetails&id=3), [Chlorophyta](http://www.marinespecies.org/aphia.php?p=taxdetails&id=801) | [Halimedaceae](http://www.marinespecies.org/aphia.php?p=taxdetails&id=368715) | Al-shoiba | Mar.  2013 | Plants green in colour when not calcified, solitary, erect, 7 – 12 cm long, branched in one plane giving it a fl at appearance, attached by a cylindrical holdfast; upper segments discoid, reniform, rounded, 0.5 – 1.5 cm high, 1.5 – 2.0 cm broad, margins thick entire; branching di- to tri-chotomous above and polychotomous at the basal part; cortex commonly composed of 3 – 4 layers of utricles, outermost utricles slightly attached when young and separating on decalcification when fertile. It is abundant on dead corals. |
| SH-10 | *Xenia umbellate*  Lamarck, 1816 | [*Alcyoniina*](http://en.wikipedia.org/w/index.php?title=Alcyoniina&action=edit&redlink=1) | [*Xeniidae*](http://en.wikipedia.org/wiki/Xeniidae) | Al-getaa Al-Kabira | Feb.  2013 | Colonies upright, lobes capitate, polyps concentrated on well-defined capitulum.Polyps not retractile, monomorphic. Colour of colonieswhite, gray, brown.  Sclerites are small ovals. Zooxanthellae present. |
| SH-11 | *Cespitularia sp* | [*Alcyoniina*](http://en.wikipedia.org/w/index.php?title=Alcyoniina&action=edit&redlink=1) | [*Xeniidae*](http://en.wikipedia.org/wiki/Xeniidae) | Sharm Obhur | Feb.  2013 | Soft colonies, appear translucent, comprised of a few lobe-like branches. Polyps only on apex and upper areas of stalks. Similar to Xenia, but polyps extend downward on stalks. Polyps often appear "basket like" (tips closely together). Numerous pinnules arranged in 1-4 rows on edges of tentacles. |
| SH-12 | *Jania adhaerens*  J.V.Lamouroux, 1816 | [Plantae](http://www.marinespecies.org/aphia.php?p=taxdetails&id=3), [Rhodophycota](http://www.marinespecies.org/aphia.php?p=taxdetails&id=182729) | [Corallinaceae](http://www.marinespecies.org/aphia.php?p=taxdetails&id=143691) | Al-Lith | Mar.  2013 | Thalli saxicolous or on other larger algae, sponge-like, forming densely clumps to about 3 cm across and about 1 cm tall, pinkish in color, branching decussate, dichotomous, intergenicula cylindrical throughout, 100-150μm (180-200μm at forking) in diameter, 2 to 6 diameter long, with blunt apices; angles wide, about 45o-80o; conceptacles infrequent, to 300μm in diameter, urn-shaped, terminal and antenniferous or non antenniferous. |
| SH-13 | *Sarcophyton trocheliophorum*  von Marenzeller, 1886 | [*Alcyoniina*](http://en.wikipedia.org/w/index.php?title=Alcyoniina&action=edit&redlink=1) | [*Alcyoniida*](http://en.wikipedia.org/w/index.php?title=Alcyoniina&action=edit&redlink=1)e | Sharm Obhur | Feb.  2013 | The Elephant Ear Coral S. trocheliophorum, like others in this genus, resembles a mushroom or toadstool. The Sarcophyton corals have a thick smooth, single stalk with a flared mushroom-shaped top, that can be folded or funnel-shaped    In varying amounts, depending on the species, Sarcophyton leathers will warp their upper surface and direct the water flow by forming ridges that lead to feathery pinnules on their tentacles. These feathery pinnules are designed to sieve the water for nutrients. The capitulum (top) has autozooid and siphonozooid polyps that are rather long when extended. When the polyps are completely retracted, the surface has a very smooth look to it.   The capitulum of the Elephant Ear Coral S. trocheliophorum is very convoluted (many deep folds), almost giving it a cauliflower look from a distance. When its polyps are extended, they are shorter and finer than others in its genus, and are typically brown or green in color. |
| SH-14 | *Turbinaria conoides*  (J.Agardh) Kützing, 1860*)* | [Plantae](http://www.marinespecies.org/aphia.php?p=taxdetails&id=3), Phaeophyceae | [Sargassaceae](http://www.algaebase.org/browse/taxonomy/?id=5187) | El-shoiba | Mar.  2013 | The thallus is erect 13 cm tall. dark brown in colour attached to substrate with branched hold fast; the erect axis is subsylindrical supporting alternatively and polystichously arranged stalked turbinate leaves; leaves are 13 - 20 mm long with substrate stalk slightly tapering below and becoming expanded triangular above; distal marginal blade may be vesiculate or evesiculate 10 - 15 mm broad, concave at the centre which may be surrounded fully or partially by an inner crown of teeth, the outer margin is lined by sharp prominent teeth; particular receptacular cluster are racemose attached to the stalk at 1/4 distance from the main axis. |
| SH-15 | *Litophyton arboreum*  Forskål, 1775 | [*Alcyoniina*](http://en.wikipedia.org/w/index.php?title=Alcyoniina&action=edit&redlink=1) | [Nephtheidae](http://www.marinespecies.org/aphia.php?p=taxdetails&id=146762) | Al-getaa Al-sghira | Feb.  2013 | Colonies arborescent with branched polyparium; flabby. Polyps arranged in catkins on the terminal branches only, not retractile,without supporting bundle. Sclerites are spindles  and unilateral spinose spindles surface layer of base of stalk also with capstans and derivations of capstans. Colour of colonies whitish, pink, brownish . Zooxanthellae present. Habitat: Shallow water. |
| SH-16 | *Tethya sp* | Porifera | Tethyidae | Sharm Obhur | Feb.  2013 | These are massive, spherical sponges with a radially symmetrical skeleton. Surface divided into raised polygonal areas separated by inhalant channels. Tough pinkish-orange rind, 2-3 mm thick, over a softer mustard gold interior with tough radiating spicule tracts. Habitat: shallow lagoons on coral rubble in crevices, under rock. ponges in the genus *Tethya* often exhibit budding propagules, a form of asexual reproduction whereby the parent sponge produces a stalk of spicules at its surface, terminating in a bud that detaches and floats away to become a separate individual. |
| SH-17 | *Rumphella aggregata*  (Nutting, 1910) | [*Alcyoniina*](http://en.wikipedia.org/w/index.php?title=Alcyoniina&action=edit&redlink=1) | Plexauridae | Al-getaa Al-sghira | April  2013 | Colony of dirty white to grey in colour when alive and brown when dried. Size of the colony is up to one meter and bushy in structure. Colonies are forming compact large shrubs with whip - like branches. The branches are smooth, thick and have blend tips. The polyps are yellowish brown in colour, monomorphic and retractile in the smooth |
| SH-18 | *Petrosia sp* (2) | Porifera | Petrosiidae | Al-getaa Al-sghira | April  2013 | Petrosiidae with an ectosomal triangular or polygonal reticulation of spicule tracts or single spicules, usually echinated at the nodes or along the tracts by a smaller category of spicules. Choanosomal skeleton basically a lamellate-isotropic retculation of spicule tracts, and an interstitial unispicular reticulation. Megascleres with distinct size categories of strongyles or oxeas, often with a special category of ectosomal microxeas or microstrongyles. Spicule complement includes two or three size categories of oxeas or strongyles, in which the smallest is concentrated at the surface. |
| SH-19 | *Xestospongia sp* | Porifera |  | Sharm Obhur | April  2013 | Specimens are often found emerging from an apparent common base. Barrel shaped (25 cm length and 15 cm diameter) with large cavity in the centre. It is characterised by the presence of finger-like structures on the outside surface. Color is Maroon to pink. Out of the water it appears brown or light pink.. Their skleton cmposed of tangential layer of single spicules in ectosomal skeleton. Choanosomal skeleton shows multispicular reticulation forming regular tracts. |
| SH-20 | *Halichlona sp1* | Porifera | [Chalinidae](http://en.wikipedia.org/wiki/Chalinidae) | Sharm Obhur | Feb.  2013 | The red tree sponge can grow to a length of 40 cm and a diameter of 4 cm but it is usually smaller in shallow water. The tree-like curved branches grow from a basal encrusting mass but very occasionally this sponge grows as a small, unbranched, flattened hemisphere. There are many small [osculi](http://en.wikipedia.org/wiki/Osculum) on the branches. It is usually a dull dark red but the colour varies and it is sometimes black, dark brown, greyish-brown, bright red or orange. In dark positions under overhangs it grows in mats and its colour is weak |
| SH-21 | *Sarcophyton glaucum*  (Quoy & Gaimard, 1833) | [*Alcyoniina*](http://en.wikipedia.org/w/index.php?title=Alcyoniina&action=edit&redlink=1) | [*Alcyoniidae*](http://www.marinespecies.org/aphia.php?p=taxdetails&id=125269) | Sharm Obhur | Feb.  2013 | The Common Toadstool Coral S. glaucum, like others in this genus, resembles a mushroom or toadstool, with their capitulum (top) having autozooid and siphonozooid polyps that are rather long when extended and are typically tipped in green. Higher lighting levels can bring out the green, with 10K or higher. When the polyps are completely retracted, the surface has a very smooth look to it. n varying amounts, depending on the species,  Sarcophyton leathers will warp their upper surface and direct the water flow by forming ridges that direct the water to feathery pinnules on their tentacles. These feathery pinnules are designed to sieve the water for nutrients. The capitulum of the Common Toadstool Coral S. glaucum is less convoluted (folding) than others in this genus. The flesh is yellow/tan with a tapering spindle like appearance at the surface of the trunk and are double-tapered inside the trunk. The flesh is firm and soft, yet easily torn, so care should be taken when handling the S. glaucum. |
| SH-22 | *Laurencia obtusa*  (Hudson) J.V.Lamouroux, 1813 | [Plantae](http://www.marinespecies.org/aphia.php?p=taxdetails&id=3), [Rhodophycota](http://www.marinespecies.org/aphia.php?p=taxdetails&id=182729) | [Rhodomelaceae](http://en.wikipedia.org/wiki/Rhodomelaceae) | Al-Lith | Mar.  2013 | Plants greenish with pink tips, up to 25 cm height, bushy, caespitose, terete to slightly compressed; branching pinnate, pyramidal, opposite, decussate or often verticillate; ramuli cylindrical to sub-clavate slightly shorter and constricted at the base with obtuse truncate apices; superficial cells not radially elongated. |
| SH-23 | *Dendronephthya sp* | [*Alcyoniina*](http://en.wikipedia.org/w/index.php?title=Alcyoniina&action=edit&redlink=1) | [Nephtheidae](http://en.wikipedia.org/wiki/Nephtheidae) | Al-getaa Al-kabira | April  2013 | What do Dendronephthya Corals look like: The Dendronephthya genus can be arboreal or grow in a fascicular fashion of bundles or clumps. They have upright stalks with branches that have bushy groupings of polyps at the ends. The polyps are autozooid, and they cannot retract. Autozooid polyps are polyps whose only function is to feed. They have an almost transparent coenenchyme, or tissue surface with visible and numerous sclerites. The sclerites can even extend past this tissue, especially when deflated, which may help with water exchange but is also for protection due to those needle like tips. Sclerites are tiny calcium bodies that help support the polyp or coral. Within their stalks and branches, there are "gastrovascular" canals that let them expel water and collapse. Some species can reach 6 feet (1.8 m) in height and 3.3 feet (1 m) in diameter. The Dendronephthya genus is the easiest to identify genus in the Nephtheidae family, due to their bright colors. The colors are crazy bright reds, purples, pinks, greens, whites oranges and yellows and mixes of these as well. Some combinations are white stalks with red and orange polyps, or white with yellow polyps, clear with white visible sclerites and pink polyps, yellow stalks with red polyps, white stalks with red polyps or all green, all yellow, all purple and more. Typical of the Nephtheidae family, they have also been known to change colors. |
| SH-24 | *Sinularia leptocladus* | [*Alcyoniina*](http://en.wikipedia.org/w/index.php?title=Alcyoniina&action=edit&redlink=1) | Alcyoniidae | Al-getaa Al-kabira | Mar.  2013 | The colonies resemble a set of fingers which held upright. This minute identification process will often involve a close look at sclerites, which are minuscule calcareous particles that live embedded on corals' tissue. This species may be found in the lower areas of a reef, especially where turbidity is higher. |
| SH-25 | *Laurencia obtusa* | [Plantae](http://www.marinespecies.org/aphia.php?p=taxdetails&id=3), [Rhodophycota](http://www.marinespecies.org/aphia.php?p=taxdetails&id=182729) | [Rhodomelaceae](http://en.wikipedia.org/wiki/Rhodomelaceae) | El-shoiba | May  2012 | Plants greenish with pink tips, up to 25 cm height, bushy, caespitose, terete to slightly compressed; branching pinnate, pyramidal, opposite, decussate or often verticillate; ramuli cylindrical to sub-clavate slightly shorter and constricted at the base with obtuse truncate apices; superfi cial cells not radially elongated. |
| SH-26 | *Halichlona sp2* | Porifera | [Chalinidae](http://en.wikipedia.org/wiki/Chalinidae) | Sharm Obhur | Sep.  2013 | Lives in association with calcareous alga, Jania adherens, and found overgrowing live branches of coral colonies. Sponge varying from cushion-shaped to massive lobate (2-15 cm high), with mountainous forms and elevated oscules at top of lobules. Surface even to smooth to lightly rough, with fistular projections 0.2-1.0 cm high, 0.3-0.8 mm in diam. Ostial pores 0.2-0.8 m in diam., abundant. Circular or oval-shaped oscula, 1.3-5.0 mm in diam., situated on summit of surface lobules and projections. Each oscule surrounded by an elevated translucent membrane, several millimeters high, which allows skeletal structure to be seen. Consistency lightly compressible, but very easily broken. Ectosomal membrane so translucent that it is possible to observe algae. Choanosome containing numerous aquiferous channels 0.2-1.0 mm in diam. Color in life varying from light blue to beige or white; preserved specimens beige |
| SH-27 | *Carteriospongia sp.* | Porifera | [Thorectidae](http://www.marinespecies.org/aphia.php?p=taxdetails&id=131627) | Al-shoiba | Sep.  2013 | Whorled or curved plate-like sponge, 15-20 cm wide and high, which can [form](http://zipcodezoo.com/glossary/Form.asp) a cup with internal spirals at maturity. Tough woody stalk ; surface with 2-3 mm wide radiating lines of low, rounded , sand-encrusted[nodules](http://zipcodezoo.com/glossary/nodule.asp) separated by furrows . Oscules 1-2 mm, on only one face of blade. Body flexible, fibrous , tears easily longitudinal . Surface sandy; creamy grey-brown. Habitat : shallow sandy lagoons . |
| SH-28 | *Lamellodysidea herbacea* (Keller, 1889) | Porifera | [Dysideidae](http://www.marinespecies.org/aphia.php?p=taxdetails&id=131624) | Al-shoiba | Sep.  2013 | The growth form of this species ranging from thinly encrusting following contours of the substrate, sometimes with surface convulted, often with erect flat lobate lamellae, or sometimes with bifurcate digitate projections, both up to several cm long and extending a long distance from surface. Margins relatively thick, not crenulated. Oscules subterminal and on later sides of digits, 2-5mm diameter, slightly raised above the surface.The color is variable, possibly depending on growth form and light regime, ranging from pale bluish grey, mauve grey, pale mauve, pale green, yellowish green, light brown to orange brown. Brownish grey in ethanol. Surface Ornamentation: Thinly encrusting plates have goose flesh microconules, with the subdermal aquiferous canals visible below the surface converging on oscules. Erect lobate and digitate growth forms evenly goose flesh, often fused with adjacent digits. No obvious ridges or grooves although microconules are sometimes aligned in rows to produce a slightly striated appearance. Points of digits usually rounded, and digits generally flattened laterally. |
| SH-29 | *Hyrtios* sp. | Porifera | [Thorectidae](http://www.marinespecies.org/aphia.php?p=taxdetails&id=131627) | Al-shoiba | Sep.  2013 | Shape, size, surface and consistency: Globular. Fixed with a small attachment area. About 10 cm in diameter. Surface conulose. A single median compound oscule, somewhat sunken below the surface. Consistency not recorded. Skeleton: Columns of sand grains of several mm in diameter (Ferrer-Hernandez mentions several cm, but it is assumed to be a misprint) cemented by spongin, interconnected by similar sand filled fibres. |
| SH-30 | [*Hyrtios erectus*(Keller, 1889)](http://www.marinespecies.org/porifera/porifera.php?p=taxdetails&id=165350) | Porifera | [Thorectidae](http://www.marinespecies.org/aphia.php?p=taxdetails&id=131627) | Al-shoiba | Sep.  2013 | The growth form of this species is Creeping and well attached to substrate, sometimes erect, small oscules visible. Lobate, globuar, irregualrly digitate, erect or sprawling. The sponge have a firm, tough texture. Its color is black/brown exterior, salmon buff interior alive. (exterior: blue; interior: bluish-grey). Oscules are found in sides of branches or lobes. The surface ornamentation is numerous, evenly distributed, fine conules. Ectosomal_Skeleton: Unarmoured, membranous, heavy collagen. In Choanosomal Skeleton, the primary fibres fully cored with detritus; these fibres project into conules; secondary fibres also cored with detritus, forming more-or-less regular reticuation; mesohyl collagen heavy. |
| SH-31 | *Carteriospongia foliascens* Pallas, 1766 | Porifera | [Thorectidae](http://www.marinespecies.org/aphia.php?p=taxdetails&id=131627) | Al-shoiba | Sep.  2013 | The foil sponge (Carteriospongia foliascens Pallas, 1766) is a species that rises from a narrow base. It grows as moderately thick, flabellate cups or fans, often nested together on short stalks. The sponge surface is coarse, with striated lines of close-set nodules on both surfaces, although primarily the upper surface, consisting of embedded sand particles. The edges of the shape are rounded, lobate or intended. The length and width can range from 4 by 6 cm to 20 by 35 cm. The thickness can range from 1.5 to 5 cm. The surface is covered with a variable degree of fleshy skin. This sponge has two distinctive sides to each leaf-like process. On one side the sponge ostia (water inlet openings) are concentrated while its oscula (water outlet openings) are tiny (<0.5mm diameter), scattered all over the upper surface, spaced ~15-20 mm apart. Colour in life ranges from olive-brown or olive green to pinkish beige, sometimes pale beige in deeper waters, and the colour is largely attributed to symbiotic cyanobacteria living in sponge cells, as evidenced by a chlorophyll pigment that turns ethanol green upon preservation. |
| SH-32 | *Caulerpa racemosa*  (Forsskål) J.Agardh, 1873 | [Plantae](http://www.marinespecies.org/aphia.php?p=taxdetails&id=3), [Chlorophyta](http://www.marinespecies.org/aphia.php?p=taxdetails&id=801) | [Caulerpaceae](http://www.marinespecies.org/aphia.php?p=taxdetails&id=143668) | Al-shoiba | Sep.  2013 | Plants pale green in colour, growing as patches, coenocytic with prostrate rhizomes and erect assimilators; assimilators often much crowded on the rhizomes, 2 – 5 cm tall with radially and closely arranged ramuli, simple or sparingly forked, covered with clavate to spherical branchlets; stalks of the branchlets short. Most commonly associated with dead corals. |
| SH-33 | *Laurencia obtusa* | [Plantae](http://www.marinespecies.org/aphia.php?p=taxdetails&id=3), [Chlorophyta](http://www.marinespecies.org/aphia.php?p=taxdetails&id=801) | [Callyspongiidae](http://www.marinespecies.org/aphia.php?p=taxdetails&id=143674) | Al-shoiba | Sep.  2013 | Globose tufts of brittle, cartilaginous, narrow, cylindrical, reddish brown to yellowish red fronds, 150 mm long, from small discoid base. Axis simple, branches patent, often opposite, spirally arranged, shorter towards apex giving irregularly pyramidal outline. Ultimate ramuli very short, truncate. With special refringent inclusions in cortical cells (corps en cerise). |
| SH-34 | *Halimeda tuna*  (J.Ellis & Solander) J.V.Lamouroux, 1816 | [Plantae](http://www.marinespecies.org/aphia.php?p=taxdetails&id=3), [Chlorophyta](http://www.marinespecies.org/aphia.php?p=taxdetails&id=801) | [Halimedaceae](http://www.marinespecies.org/aphia.php?p=taxdetails&id=368715) | Al-shoiba | Sep.  2013 | Plants dark green in colour, 8 – 10 cm tall, generally tufted, moderately calcified and attached by compressed conical holdfast, branching in one plane, dichotomous or trichotomous upper segments, cuneate remiform discoid, 6 – 13 mm high, 5 – 23 mm broad, margins entire; subcortical utricles turbinate to clavate 30 – 110 μm diameter and cortical utricles 25 – 125 μm diameter; medullary filaments entangled, fusing 2 – 3 together at the nodes, dichotomously branched above the fused fi laments. |
| SH-35 | *Sertularia* sp. | [Hydrozoa](http://www.marinespecies.org/aphia.php?p=taxdetails&id=1337) | [Sertulariidae](http://www.marinespecies.org/aphia.php?p=taxdetails&id=1614) | Al-shoiba | Sep.  2013 | *Sertularia* is a monosiphonic species of up to 2.5 cm in length. Hydrocaulus with alternate hydrocladia at approximately regular intervals. Hydrocaulus wider than hydrocladia and usually with three hydrothecae. Hydrocladial inter­nodes with two hydrothecae opposite touching frontally. Gonothecae slightly compressed, with circular ribs and two apical spines. |
| SH-36 | *Dysideid sponge* | Porifera | [Dysideidae](http://www.marinespecies.org/aphia.php?p=taxdetails&id=131624) | Al-shoiba | Sep.  2013 | The color is grey to, sand grains are over organic matter. It is massive lobose in form. It is less than 15cm across. The surface is conulate. |
| SH-37 | *Laurencia sp.* | [Plantae](http://www.marinespecies.org/aphia.php?p=taxdetails&id=3), [Chlorophyta](http://www.marinespecies.org/aphia.php?p=taxdetails&id=801) | [Rhodomelaceae](http://www.marinespecies.org/aphia.php?p=taxdetails&id=143674) | Al-shoiba | Sep.  2013 | Plants pinkish to dark red in colour, 2.5 cm in height, growing as cushion or patches; fronds pulvinate, intricately, alternately branched; branches cylindrical, tapering from base to apices, covered with small spines; superficial cells slightly radially elongated. |
| SH-38 | *Callyspongia crassa (Keller, 1889)* | Porifera | Callyspongiidae | Sharm Obhur | May  2012 | The basic shape of this species is a cluster of long erect tubes, tapering only slightly. The tubes have a wide, thin-walled vent, and its outer walls are strongly conulose. The tubes show a considerable tendency to anastomose and this may lead eventually to hollow, fan shaped specimens. Tubes up to 25 cm high and 5 cm in diameter. Fan shaped forms up to 18 cm high, 21 cm in the widest expansion and up to 3 cm in thickness. Vents up to 2.5 cm in diameter. Conules about 3 mm high and 5 mm apart. Surface of outer walls smooth between the conules. The consistency is very spongy. This sponge lives individually or in groups on protected reefs and terrace. This tube sponge can be found at depths of 5 to 30 m. The sponge grows tubular or barrel-shaped and grows up to 50 cm. |
| SH-39 | *Callyspongia sp 1* | Porifera | Callyspongiidae | Sharm Obhur | May  2012 | Clusters of hollow tubes, Surface with protuberances with round or blade-like outlines. (up to 10 mm high, 3-10 mm apart). |
| SH-40 | *Callyspongia sp.2* | Porifera | Callyspongiidae | Sharm Obhur | May  2012 | Vase-shaped or tubaeform with the outer surface characteristically provided with an elaborate system of meandering grooves and/or rounded pits. Terminal vent somewhat constricted, with a transparent, thin collar. Vases mostly solitary, but occasionally there are small side-tubes. Inner walls smooth, somewhat ridged lengthwise, with scattered oscules, 1-5 mm in diameter. Longitudinal fibrofascicles stand out clearly on the inner wall and collar. Vases up to 27 cm in height, 13.5 cm in diameter; vents up to 6.5 cm in diameter. Very spongy in consistency. |
| SH-41 | *Callyspongia sp 3* | Porifera | Callyspongiidae | Sharm Obhur | May  2012 | It is compsed of cluster of long shaped tubes (5-30 cm high, 1-10 cm in diameter, 1-10 mm thick). Brownish to gray in color, with golden, pink or greenish tinges. Surface almost smooth. Compressible and elastic. |
| SH-42 | *Ascidia sp.* | Chordate | Ascidiidae | Sharm Obhur | May  2012 | Color black. Length up to 10 cm. solitary. Interior siphon. Living on dead corals and rubble of lagoons in sheltered lagoons or sheltered areas |
| SH-43 | Sea cucumber (skin)  Thelenota ananas (Red worm Cucumber) | Phylum: Echinodermata  Class:Holothuroidea | Stichopodidae | Qata AlKabira | March, 2014 | Thelenota ananas is a grey, orange, to red sea cucumber, often with a purple cast. It is a very large species (to 600 (750) mm), square in cross section with prominent 'cockscomb' papillae over its upper surface. It has a thick but pliable body and a smooth tegument. Spicules are delicate, dichotomously branched rods without lateral spines (T. ananas spicules). Thelenota ananas can be found on reefs, exposed on rubble. |
| SH-44 | Sea cucumber Thelenota ananas (Red worm Cucumber) | Phylum: Echinodermata  Class:Holothuroidea | Stichopodidae | Qataa AlKabira | March, 2014 | Thelenota ananas is a grey, orange, to red sea cucumber, often with a purple cast. It is a very large species (to 600 (750) mm), square in cross section with prominent 'cockscomb' papillae over its upper surface. It has a thick but pliable body and a smooth tegument. Spicules are delicate, dichotomously branched rods without lateral spines (T. ananas spicules). Thelenota ananas can be found on reefs, exposed on rubble. |
| SH-45 | *Moora producens* | Cyanobacteria | Oscillatoriaceae |  | Dec. 2013 | The thallus morphology ranges from tuft to extensive mats. The coloration is highly varied, ranging from dark red to greenish-brown. Filaments 30–67 (82) mm width. Sheaths are colorless, thin (1–2 mm, but can be 12 mm wide in extreme situations), slightly lamellose. Trichomes are cylindrical, attenuated on the end, constricted on the cell walls, cells (25) 30–65 (70) mm wide and 3–7 mm long. Apical cells are rounded, without calyptra. (Engene, 2012) |
| SH-46 | *Symploca sp.* | Cyanobacteria | Phormidiaceae |  | Dec. 2013 | Filamentous - colonial; colonies form of flat mats on the substrates (initial stages), then grow up vertically erected fascicles of filaments, which occasionally form small, characteristical "grass-like" mats. Fascicles are sometimes branched or anastomotic. Trichomes solitary, slightly coiled, cylindrical, usually not constricted at cross walls, enveloped obligatory by firm, thin, sometimes outside gelatinized sheaths. Ends of trichomes usually cylindrical, rarely slightly attenuated. Cells cylindrical, without aerotopes and usually without prominent granules, terminal cells rounded, without calyptras. (Komarek, 1992) |
| SH-47 | Unidentified Cyanobacteria | | |  | May 2014 | Blue-green algae  Depth 15.6 m |
| SH-48 |
| SH-49 |
| SH-50 |
| SH-51 |
| SH-52 |
| SH-53 | Green alga  Tydemania expeditionis  Weber-van Bosse, 1901 | Phylum: [Chlorophyta](http://www.marinespecies.org/aphia.php?p=taxdetails&id=801)  Class:  [Ulvophyceae](http://www.marinespecies.org/aphia.php?p=taxdetails&id=146216) | Udoteaceae |  |  | Thallus green, large and calcified, consisting of a series of almost contiguous glomeruli arising in whorls from a single or branched monosiphonous main axis or stolon composed of a single large siphon. Glomeruli, to 3 cm or more in diameter, are composed of relatively finer, di- to tetrachotomously branched tapering siphons. Small, monostromatic flabella, ca. 1-1.8 cm. long, of laterally connate dichotomous siphons sometimesreplace basal glomeruli. |
| SH-54 | Sinularia polydactyla (Eherenberg, 1834) | Cnidaria | Octocorallia |  |  | The colonies of this species resemble a set of fingers held upright. Though these species are very easily identifiable, discerning the various species amongst this genus is no easy task. Sclerites are minuscule calcareous particles that live embedded on corals' tissue. This species may be found in the lower areas of a reef, especially where turbidity is higher. Colonies encrusting or with distinctstalk. Polyparium smooth, lobed, with digitate processes, or with crests. Polyps monomorphic. Internalsclerites are large tuberculate spindles, > 2 mm in length. Sclerites of surface layer are clubs and small spindles. Colour of colonies whitish, yellowish, brownish. Zooxanthellae present. |
| SH-55 | Sinularia leptoclados  (Ehrenberg, 1834) | Cnidaria | Octocorallia |  |  | The primary lobes branch off once or twice, lobules finger-shaped, up to 1 cm wide and 3 cm long. The polyps have a collaret and eight points. Points with poorly developed clubs, up to 0.13 mm long, collaret with bent spindles. Tentacle sclerites not observed. The surface layer of the lobules has leptoclados-type clubs, the smallest are 0.05 mm long, most are around 0.10 mm, but some reach a length of 0.15 mm; in addition longer wart clubs are present, up to 0.20 mm long. Furthermore, the surface layer of the lobules has spindles, up to 0.45 mm long, with simple tubercles; the smaller ones with a distinct median waist. The interior of the colony has unbranched spindles. In the lobules they are up to 2.5 mm long, with simple or complex tubercles. In the base of the colony the spindles are also up to 2 mm long, with more complex tubercles. The sclerites of the surface layer of the base of the colony resemble those of the surface layer of the lobules but they are wider. Colour is brown |
| SH-56 | *Lobophytom*  *crassum*  von Marenzeller, 1886 | Cnidaria | Octocorallia |  |  | Colonies with short wide stalk or encrusting. Polyparium with lobes or crests, sometimes flat. Polyps dimorphic. Sclerites of surface layerare clubs; sclerites of interior are capstans and spindles. Colour of colonies light yellow, beige, brown, greenish. Polyps often white. Zooxanthellae present. |
| SH-57 | Rhytisma fulvum (Forskål, 1775) | Cnidaria | Octocorallia |  |  | Thin, encrusting mats of irregular shape, about 2-4 mm thick, occasionally with hillocks where the colony is considerably thickened, overgrowing dead, sometimes live substrate. The large gastric cavities of the polyps extend right through the colony with only a thin layer of coenenchyme separating them from the substrate. Polyps are monomorphic, and totally retractile into apertures that may be slightly raised on calyx-like mounds. The coenenchyme contains large spindles, up to several mm long, ornamented with small spines. When very long, the spindles can be arranged as a conspicuous honeycomb-like network on the upper surface of the colony with a polyp within each ‘cell’. Smaller spindles may be grouped en chevron to form eight teeth surrounding each polyp aperture. The polyps contain similar spindles arranged as crown and points, and often have granular scales in the tentacles. Colony colour is variable. The encrusting mat can be greyish-purple, grey-blue, greenish-yellow, cream or pale brown, and the polyps intense greenish-yellow, cream, orange, or greyish-purple. Abundant zooxanthellae. |
| SH-58 | Unidentified Sponge | | |  |  |  |
| SH-59 | [Crella cyathophora Carter, 1869](http://www.marinespecies.org/porifera/porifera.php?p=taxdetails&id=184492) | Phylium: Porifera  Class: Demospongiae | [Crellidae](http://species-identification.org/species.php?species_group=sponges&id=89&menuentry=groepen) |  |  | Crella cyatophora is a thick encrusting sponge, externally light gray to beige and internally has an orange color Its smooth surface has numerous elevated sub-circular pores with a star-like center. The noticeable are the elevated oscula, smooth around the edges, and a peek inside will reveal several septa. An uncommon characteristic of this sponge is its contractile reaction to tactile stimuli. It is lobate or cushion-shaped sponge of up to 30 cm across The surface of in situ specimens have transparent rounded pore fields and fairly large oscules with swollen darker coloured excurrent canals Surface more or less transparent with densely packed inhalant pores gathered into groups (areolated porefields) These inhalant areas are quite distinctive as the surface between the pore areas is less transparent. Oscules large, allowing a view of the excurrent channels; terminating lobes of the body. One or two dark exhalant canals run down the sides of the oscular lobes. |
| SH-60 | Dendronephtya sp. | Cnidaria | Octocorallia  (Nephtheidae) |  |  | Colonies arborescent with branched polyparium. Colonialgrowth form is umbellate, glomerate or divaricate. Polyps not retractile, grouped but not forming catkins. Each polyp has a supporting bundle of sclerites. Sclerites of very diverse form. Colour of colonies red, yellow, orange, purple, often bicoloured. Zooxanthellae absent. |
| SH-61 | Dendronephthya mucronata?(Pütier, 1900) | Cnidaria | Octocorallia  (Nephtheidae) |  |  | Colonies arborescent with branched polyparium. Colonialgrowth form is umbellate, glomerate or divaricate. Polyps not retractile, grouped but not forming catkins. Each polyphas a supporting bundle of sclerites. Sclerites of very diverse form. Colour of colonies red, yellow, orange, purple, often bicoloured. Zooxanthellae absent |
| SH-62 | Stereonephthya sp.? | Cnidaria | Octocorallia  (Nephtheidae) |  |  | Colonies arborescent with branched polyparium, stiff. Polyps notretractile, distributed on distal part of terminal branches, with supporting bundle. Sclerites are spindles and unilateral spinose spindles; surface layer of base of stalk also with capstans and derivations of capstans. Colonies white or coloured. Zooxanthellae absent. |
| SH-63 | Unidentified Cyanobacteria | | | Abo teir  N 21 40 354  E 38 50 660 | Sep. 2014 | Blue-green algae |
| SH-64 |
| SH-65 |
| SH-66 |
| SH-67 |
| SH-68 |
| SH-69 |
| SH-70 |
| SH-71 |

**Table 2S.** Antifouling activity of the marine samples

| **Sample code** | **Source species** | **Classes** | **Settlement rates(48 hrs)** | | | **Toxicity**  **(120 hrs)** | | | **Settlement rates**  **(48 hrs)** | | |
| --- | --- | --- | --- | --- | --- | --- | --- | --- | --- | --- | --- |
| **100** | **10** | **1** | **100** | **10** | **1** | **100** | **10** | **1** |
| SH-01 | *Hypnea cornuta* | red algae | 83 | 92 |  | 0 | 0 |  | - | - |  |
| SH-02 | *Laurencia papillosa* | red algae | 73 | 87 | 71 | 0 | 0 | 0 | - | - | - |
| SH-03 | *Siphonochalina* siphonella. | sponge | 0 | 0 | 61 | 94 | 0 | 0 | ++ | ++ | - |
| SH-04 | *Sinularia polydactyla* | soft coral | 0 | 40 | 61 | 100 | 0 | 0 | ++ | - | - |
| SH-05 | *Heteroxenia fuscescens* | soft coral | 0 | 100 |  | 0 | 0 |  | ++ | - |  |
| SH-06 | *Petrosia* sp. | sponge | 0 | 69 |  | 0 | 0 |  | ++ | - |  |
| SH-07 | *Hyrtios erectus* (1) | sponge | 5 | 29 | 74 | 24 | 0 | 0 | ++ | + | - |
| SH-08 | *Halimeda tuna* (1) | green algae | 9 | 100 |  | 45 | 0 |  | ++ | - |  |
| SH-09 | *Halimeda macroloba* | green algae | 62 | 73 |  | 0 | 0 |  | - | - |  |
| SH-10 | *Xenia umbellate* | soft coral | 0 | 92 |  | 0 | 0 |  | ++ | - |  |
| SH-11 | *Cespitularia* sp. | soft coral | 0 | 0 |  | 100 | 0 |  | ++ | ++ |  |
| SH-12 | *Jania adhaerens* | red algae | 0 | 83 |  | 0 | 0 |  | ++ | - |  |
| SH-13 | *Sarcophyton trocheliaphorum* | soft coral | 0 | 0 |  | 83 | 0 |  | ++ | ++ |  |
| SH-14 | *Turbinaria conoides* | brown algae | 42 | 50 |  | 0 | 0 |  | - | - |  |
| SH-15 | *Litophyton arboretum* | soft coral | 0 | 41 | 60 | 27 | 0 | 0 | ++ | - | - |
| SH-16 | *Tethya* sp. | sponge | 0 | 33 |  | 85 | 0 |  | ++ | - |  |
| SH-17 | *Rumphella aggregate* | soft coral | 0 | 67 |  | 0 | 0 |  | ++ | - |  |
| SH-18 | *Petrosia* sp. | sponge | 9 | 38 |  | 0 | 0 |  | ++ | - |  |
| SH-19 | *Xestospongia* sp. | sponge | 0 | 17 |  | 100 | 100 |  | ++ | + |  |
| SH-20 | *Halichlona* sp. (1) | sponge | 77 | 92 |  | 0 | 0 |  | - | - |  |
| SH-21 | *Sarcophyton glaucum* (1) | soft coral | 0 | 0 | 86 | 92 | 4 | 0 | ++ | ++ | - |
| SH-22 | *Laurencia obtusa* (Mars, 2013) | red algae | 0 | 54 |  | 83 | 0 |  | ++ | - |  |
| SH-23 | *Dendronephthya* | soft coral | 0 | 25 |  | 100 | 0 |  | ++ | + |  |
| SH-24 | *Sinularia leptoclades* | soft coral | 0 | 4 | 75 | 96 | 0 | 0 | ++ | ++ | - |
| SH-25 | *Laurencia obtusa* (Mars, 2012) | red algae | 0 | 73 |  | 82 | 0 |  | ++ | - |  |
| SH-26 | *Halichlona* sp. (2) | sponge | 30 | 15 |  | 10 | 0 |  | + | ++ |  |
| SH-27 | *Carteriospongia* sp. | sponge | 0 | 67 |  | 12 | 7 |  | ++ | - |  |
| SH-28 | *Lamellodysidea herbacea* | sponge | 4 | 68 |  | 7 | 0 |  | ++ | - |  |
| SH-29 | *Hyrtios sp.* | sponge | 0 | 0 | 41 | 43 | 40 | 0 | ++ | ++ | - |
| SH-30 | *Hyrtios erectus* (2) | sponge | 8 | 50 |  | 0 | 19 |  | ++ | - |  |
| SH-31 | *Carteriospongia foliascens* | sponge | 7 | 80 |  | 0 | 5 |  | ++ | - |  |
| SH-32 | *Caulerpa racemose* | green algae | 5 | 95 |  | 15 | 0 |  | ++ | - |  |
| SH-33 | *Laurencia obtusa* | red algae | 0 | 44 |  | 15 | 0 |  | ++ | - |  |
| SH-34 | *Halimeda tuna* (2) | green algae | 15 | 12 | 45 | 12 | 15 | 0 | ++ | ++ | - |
| SH-35 | *Sertularia* sp. | hydrozoan | 30 | 9 | 20 | 2 | 2 | 0 | + | ++ | + |
| SH-36 | *Dysideid sponge* | sponge | 0 | 8 | 13 | 64 | 36 | 0 | ++ | ++ | ++ |
| SH-37 | *Laurencia* sp. | red algae | 0 | 25 | 54 | 19 | 17 | 13 | ++ | + | - |
| SH-38 | *Callyspongia crassa* | sponge | 4 | 61 |  | 4 | 17 |  | ++ | - |  |
| SH-39 | *Callyspongia sp.*(1) | sponge | 32 | 21 |  | 5 | 8 |  | - | + |  |
| SH-40 | *Callyspongia sp.*(2) | sponge | 21 | 12 | 38 | 0 | 10 | 0 | + | ++ | - |
| SH-41 | *Callyspongia sp.*(3) | sponge | 4 | 29 |  | 4 | 16 |  | ++ | + |  |
| SH-42 | *Ascidian* sp. | ascidian | 0 | 29 | 23 | 5 | 0 | 0 | ++ | + | + |
| SH-43 | *Thelenota ananas* (skin) | sea cucumber | 47 | 47 | 53 | 0 | 0 | 0 | - | - | - |
| SH-44 | *Thelenota ananas* (Cuvierian tubules) | sea cucumber | 34 | 80 | 82 | 0 | 0 | 0 | - | - | - |
| SH-45 | *Moorea producens* (S-1301) | cyanobacteria | 70 | 31 | 44 | 18 | 0 | 0 | - | - | - |
| SH-46 | *Symploca* sp. (S-1302) | cyanobacteria | 0 | 1 | 44 | 100 | 88 | 0 | ++ | ++ | - |
| SH-47 | Blue-green algae | cyanobacteria | 0 | 9 |  | 72 | 0 |  | ++ | ++ |  |
| SH-48 | Blue-green algae | cyanobacteria | 0 | 2 | 41 | 100 | 90 | 0 | ++ | ++ | - |
| SH-49 | Blue-green algae | cyanobacteria | 0 | 0 | 66 | 100 | 49 | 9 | ++ | ++ | - |
| SH-50 | Blue-green algae | cyanobacteria | 0 | 20 | 56 | 100 | 67 | 5 | ++ | ++ | - |
| SH-51 | Blue-green algae | cyanobacteria | 27 | 32 | 54 | 2 | 0 | 0 | + | - | - |
| SH-52 | Blue-green algae | cyanobacteria | 0 | 21 |  | 96 | 25 |  | ++ | + |  |
| SH-53 | *Tydemania* sp. | green algae | 60 | 48 |  | 0 | 0 |  | - | - |  |
| SH-54 | *Sinularia* sp. 1 | soft coral | 0 | 23 |  | 0 | 0 |  | ++ | + |  |
| SH-55 | *Sinularia* *leptoclados* | soft coral | 9 | 0 |  | 0 | 0 |  | ++ | ++ |  |
| SH-56 | *Lobophyton* sp. | soft coral | 0 | 19 | 48 | 0 | 0 | 3 | ++ | + | - |
| SH-57 | Rhytisma fulvum | soft coral | 0 | 52 |  | 60 | 0 |  | ++ | - |  |
| SH-58 | Soft coral K | soft coral | 4 | 22 |  | 12 | 0 |  | ++ | + |  |
| SH-59 | *Crella cyathophora Carter* | sponge | 21 | 16 |  | 0 | 0 |  | + | + |  |
| SH-60 | *Dendronephtya* sp. | soft coral | 1 | 18 | 13 | 34 | 0 | 0 | ++ | + | ++ |
| SH-61 | Sponge N | sponge | 6 | 16 | 65 | 0 | 0 | 0 | ++ | + | - |
| SH-62 | *Stereonephthya* sp. | soft coral | 38 | 24 | 76 | 0 | 0 | 2 | - | + | - |
| SH-63 | Blue-green algae #1 | cyanobacteria | 32 | 54 |  | 5 | 0 |  | - | - |  |
| SH-64 | Blue-green algae #2 | cyanobacteria | 0 | 67 |  | 100 | 18 |  | ++ | - |  |
| SH-65 | Blue-green algae #3 | cyanobacteria | 0 | 6 |  | 19 | 0 |  | ++ | ++ |  |
| SH-66 | Blue-green algae #4 | cyanobacteria | 0 | 8 |  | 47 | 18 |  | ++ | ++ |  |
| SH-67 | Blue-green algae #5 | cyanobacteria | 3 | 19 |  | 100 | 79 |  | ++ | + |  |
| SH-68 | Blue-green algae #6 | cyanobacteria | 6 | 53 |  | 78 | 0 |  | ++ | - |  |
| SH-69 | Blue-green algae #7 | cyanobacteria | 20 | 56 |  | 71 | 8 |  | + | - |  |
| SH-70 | Blue-green algae #8 | cyanobacteria | 0 | 11 |  | 94 | 52 |  | ++ | ++ |  |
| SH-71 | Blue-green algae #9 | cyanobacteria | 27 | 37 |  | 29 | 0 |  | + | - |  |

| if value for settlement above 31%:- |  | active at 1 µg/mL |
| --- | --- | --- |
| if value for settlement between 16 and 30%: + |  | ++ at 10 µg/mL |
| if value for settlement between 0 and 15%: ++ |  | + at 10 µg/mL |
| if value for toxicity above 30%: X |  |  |
| if value for toxicity under 30%: - |  |  |

**Figure 1S: Antifouling activity of the first patch of marine organisms (Samples from SH-1 to SH-26)**

**Figure 2S. Antifouling activity of the second patch of marine organisms (Samples from SH-27 to SH-42)**

**Figure 3S. Antifouling activity of the second patch of marine organisms (Samples from SH-43 to SH-52)**

**Figure 4S. Antifouling activity of the second patch of marine organisms (Samples from SH-53 to SH-62)**

**Figure 5S. Antifouling activity of the retested extracts (Samples from SH-62 to SH-70) at lower concentration**

**Figure 6S. Antifouling activity of the potent extracts at lower concentration**

**Figure 7S. Antifouling activity of the potent extracts at lower concentration**

Figure 8S: 1H NMR spectra of compound 1

Figure 9S: 13C NMR spectra of compound 1

Figure 10S: 1H NMR spectra of compound 2

Figure 11S: 13C NMR spectra of compound 2

Figure 12S: 1H NMR spectra of compound 3

Figure 13S: 1H NMR spectra of compound 3

Figure 14S: 13C NMR spectra of compound 3


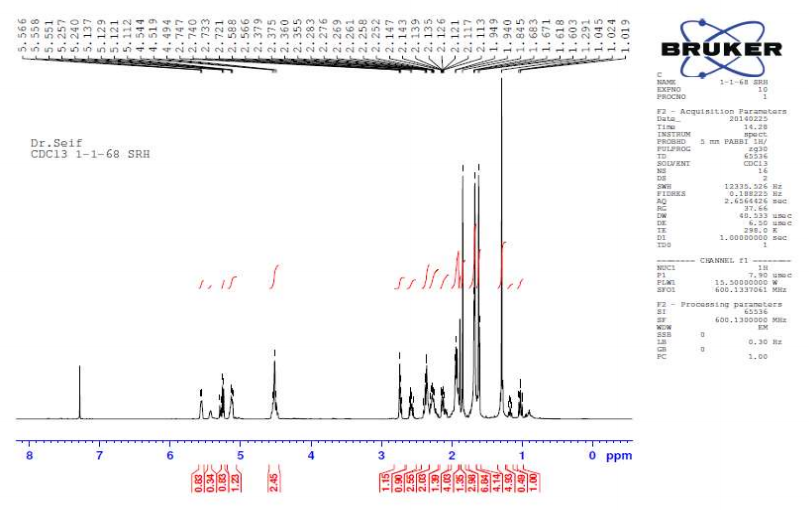


Figure 15S: 1H NMR spectra of compound 4


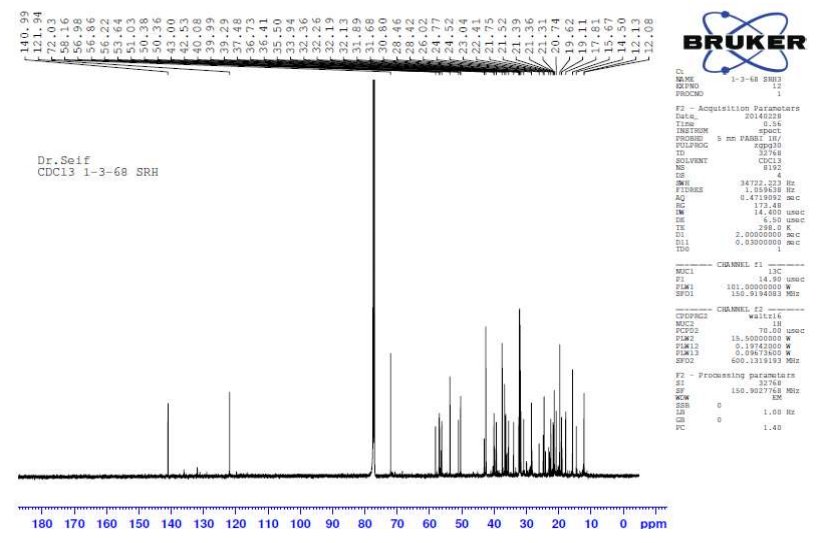


Figure 16S: 13C NMR spectra of compound 4

Figure17S: 1H NMR spectra of compound 5

Figure 18S: 1H NMR spectra of compound 5

Figure 19S: 13C NMR spectra of compound 5

Figure 20S: 1H NMR spectra of compound 6


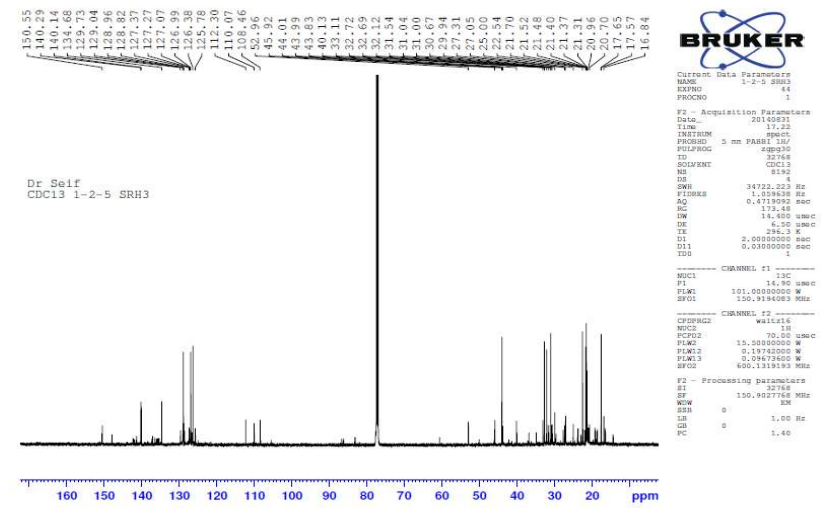


Figure 21S: 13C NMR spectra of compound 6

Figure 21S: 1H NMR spectra of compound **7**

Figure 22S: 1H NMR spectra of compound **7**

Figure 23S: 1H NMR spectra of compound **7**

Figure 24S: 13CNMR spectra of compound **7**

Figure 25S: 13C NMR spectra of compound **7**

Figure 26S: 1H NMR spectra of compound **8**

Figure 27S: 1H NMR spectra of compound **8**

Figure 28S: 13C NMR spectra of compound **8**

Figure 29S: 1H NMR spectra of compound **9**

Figure 30S: 1H NMR spectra of compound **9**

Figure 31S: 13C NMR spectra of compound **9**

Figure 32S: 1H NMR spectra of compound **10**

Figure 33S: 1H NMR spectra of compound **10**

Figure 34S: 13C NMR spectra of compound **10**

Figure 35S: 13C NMR spectra of compound **10**

**
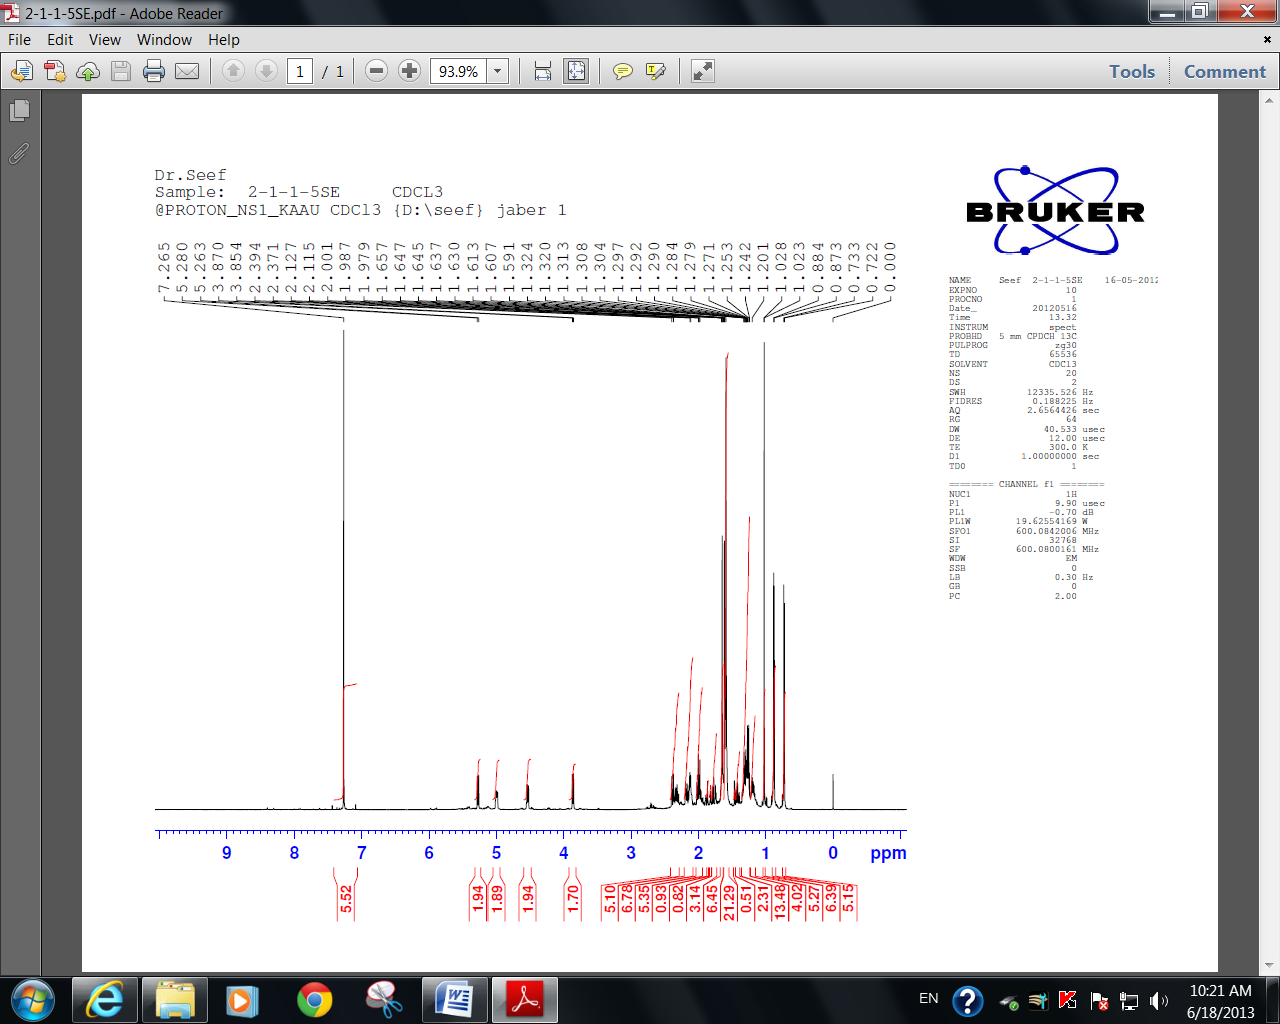
**

Figure 36S: 1H NMR spectra of compound **11**

**
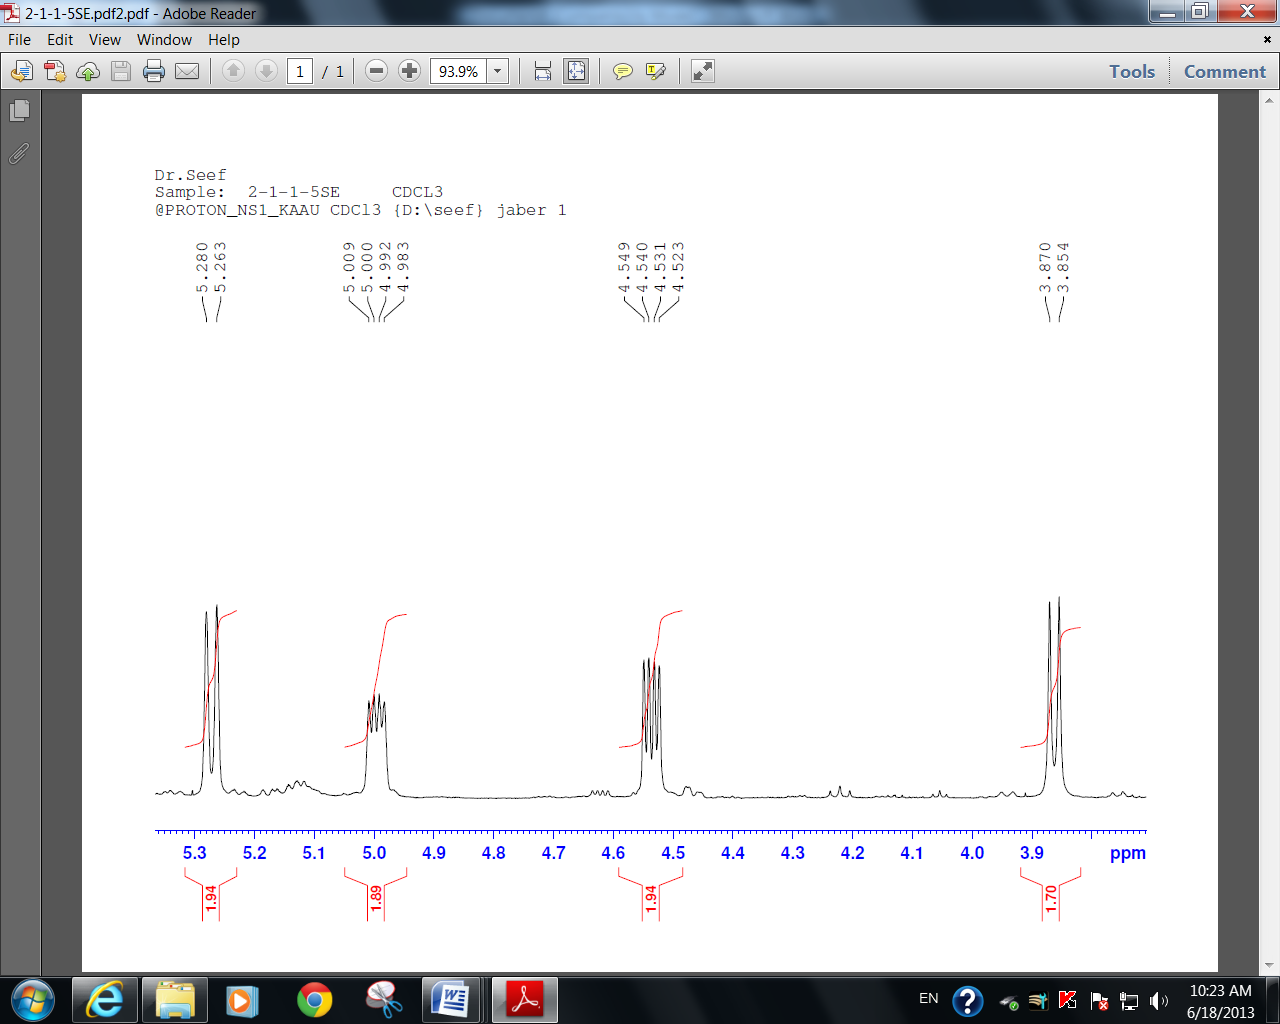
**

Figure 37S: 1H NMR spectra of compound **11**

**
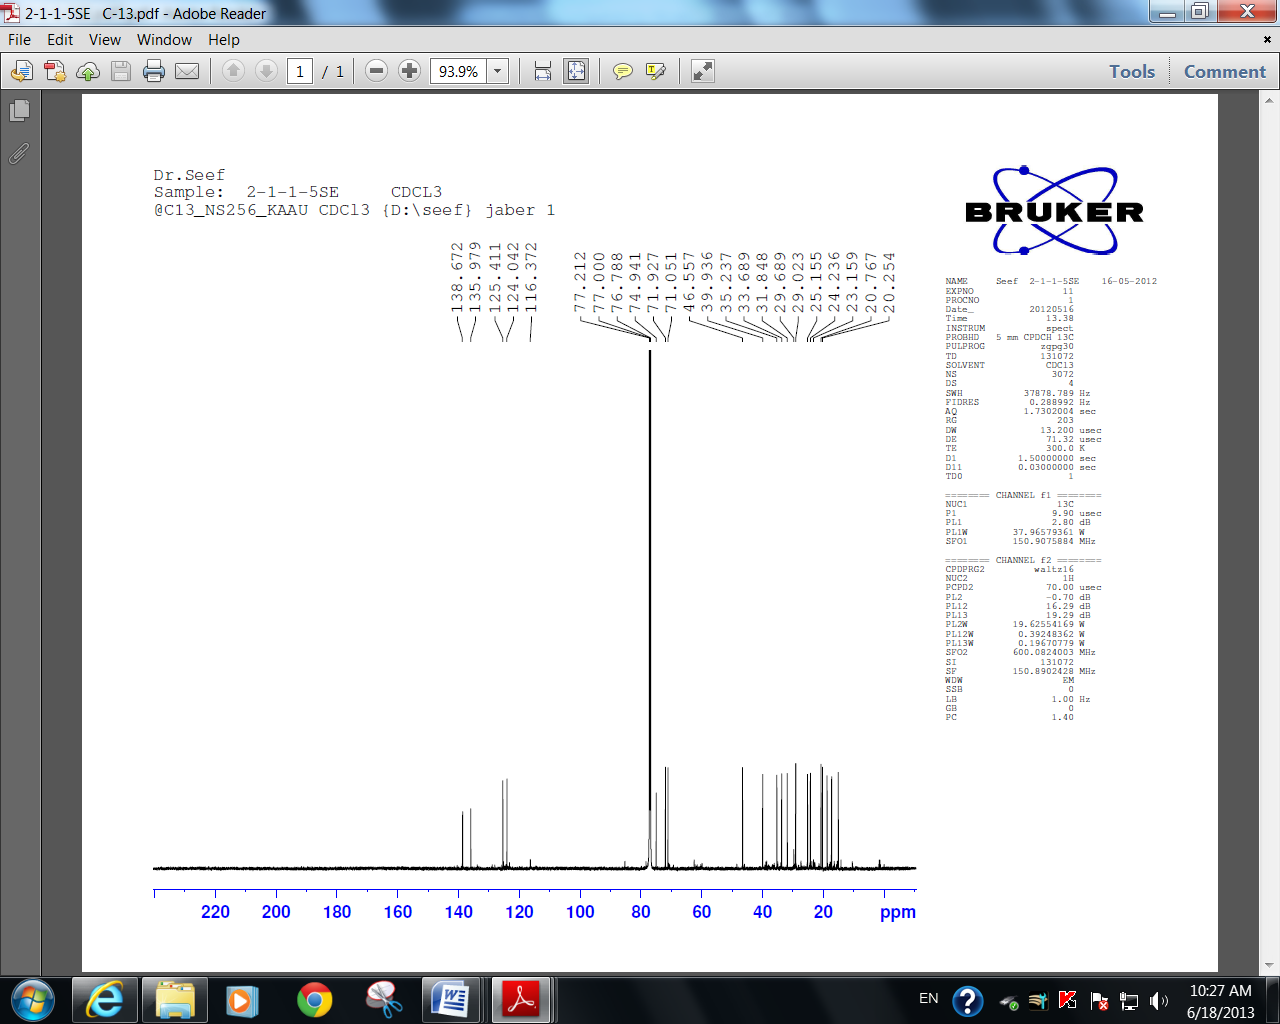
**

Figure 38S: 13C NMR spectra of compound **11**

Figure 39S: 1H NMR spectra of compound **12**

Figure 40S: 1H NMR spectra of compound **12**

Figure 41S: 13C NMR spectra of compound **12**
